# Supplementary material for: Maggot Extract Interrupts Bacterial Biofilm Formation and Maturation in Combination with Antibiotics by Reducing the Expression of Virulence Genes
Source: MDPI journal article supplement (doi:10.3390/life12020237), 2022-02-04
Supplement: s1 [file s1]

## Article

# Maggot Extract Interrupts Bacterial Biofilm Formation and Maturation in Combination with Antibiotics by Reducing the Expression of Virulence Genes

Mustafa Becerikli <sup>1</sup>, Christoph Wallner <sup>1</sup>, Mehran Dadras <sup>1</sup>, Johannes M. Wagner <sup>1</sup>, Stephanie Dittfeld <sup>1</sup>, Birger Jettkant <sup>2</sup>, Falk Gestmann <sup>3</sup>, Heinz Mehlhorn <sup>3</sup>, Tim Mehlhorn-Diehl <sup>3</sup>, Marcus Lehnhardt <sup>1</sup> and Björn Behr <sup>1\*</sup>

- <sup>1</sup> Department of Plastic and Reconstructive Surgery, BG University Hospital Bergmannsheil, Ruhr-University Bochum, 44789 Bochum, Germany; mustafa.becerikli@rub.de (M.B.); c.wallner88@gmail.com (C.W.); mdadras@outlook.com (M.D.); max.jay.wagner@googlemail.com (J.M.W.); dittfeld.stephanie@gmail.com (S.D.); marcus.lehnhardt@bergmannsheil.de (M.L.)
- <sup>2</sup> Department of General and Trauma Surgery, BG University Hospital Bergmannsheil, Ruhr-University Bochum, Bochum, Germany; jettkant@ipa-dguv.de
- <sup>3</sup> Alpha-Biocare GmbH, Neuss, Germany; gestmann@alphabiocare.de (F.G.); mehlhorn@uni-duesseldorf.de (H.M.); tim.mehlhorn@alphabiocare.de (T.M.-D.)
- \* Correspondence: bjorn.behr@rub.de; Tel.: +49-234-302-3443

**Citation:** Becerikli, M.; Wallner, C.; Dadras, M.; Wagner, J.M.; Dittfeld, S.; Jettkant, B.; Gestmann, F.; Mehlhorn, H.; Mehlhorn-Diehl, T.; Lehnhardt, M.; et al. Maggot Extract Interrupts Bacterial Biofilm Formation and Maturation in Combination with Antibiotics by Reducing the Expression of Virulence Genes. *Life* **2022**, *12*, 237. <https://doi.org/10.3390/life12020237>

Academic Editor: Cheng-Yen Kao

Received: 28 December 2021

Accepted: 2 February 2022

Published: 4 February 2022

**Publisher's Note:** MDPI stays neutral with regard to jurisdictional claims in published maps and institutional affiliations.

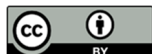

**Copyright:** © 2022 by the authors. Licensee MDPI, Basel, Switzerland. This article is an open access article distributed under the terms and conditions of the Creative Commons Attribution (CC BY) license (<http://creativecommons.org/licenses/by/4.0/>).

**Table S1.** Primer sequences (5'→3') for qRT-PCR.

| Primer name | Sequence             |
|-------------|----------------------|
| lasR F      | ACGCTCAAGTGGAAAATTGG |
| lasR R      | GTAGATGGACGGTCCCAGA  |
| rhlR F      | AGGAATGACGGAGGCTTTT  |
| rhlR R      | CCCGTAGTTCTGCATCTGGT |
| rhlA F      | CGAGGTCAATCACCTGGTCT |
| rhlA R      | GACGGTCTCGTTGAGCAGAT |
| oprF F      | GGTACTTCCTGACCGACGA  |
| oprF R      | TCGCTGTTGATGTTGGTGAT |

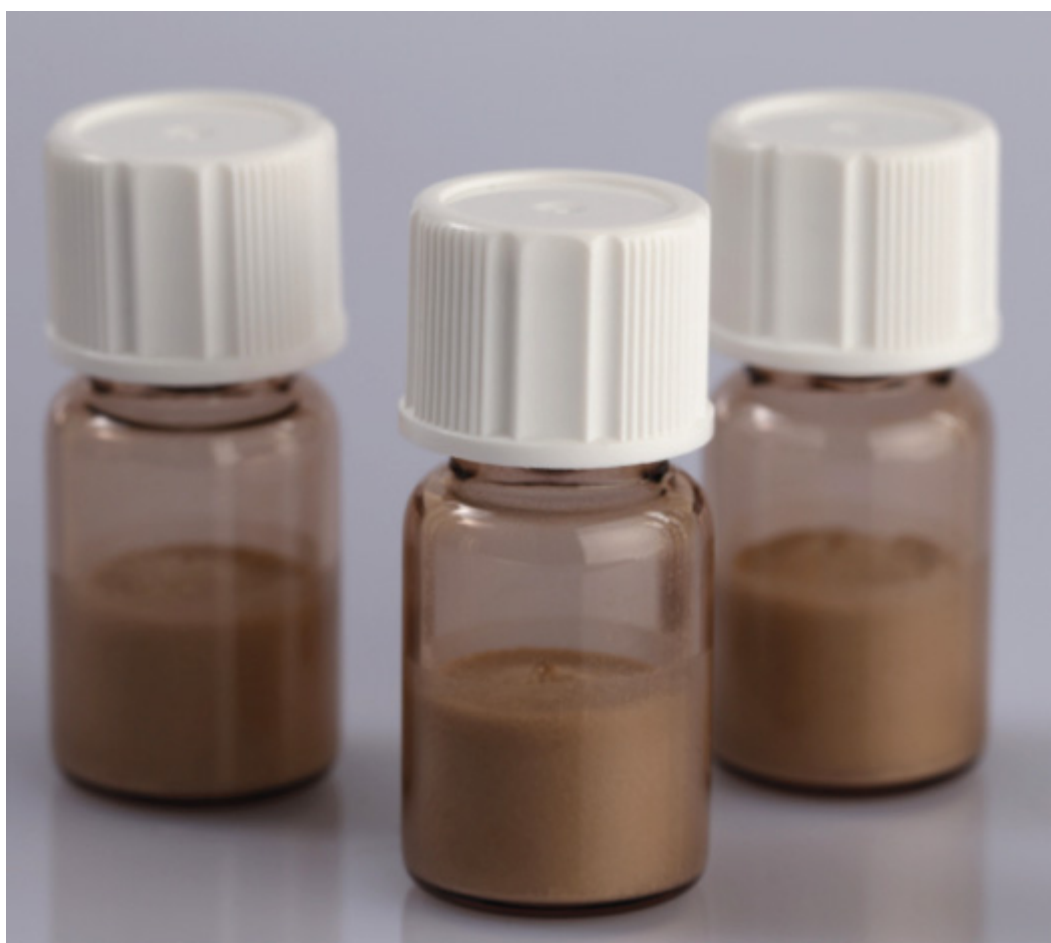**Figure S1.** Larveel®, a sterile powder made from 100% larvae of *Lucilia sericata*.

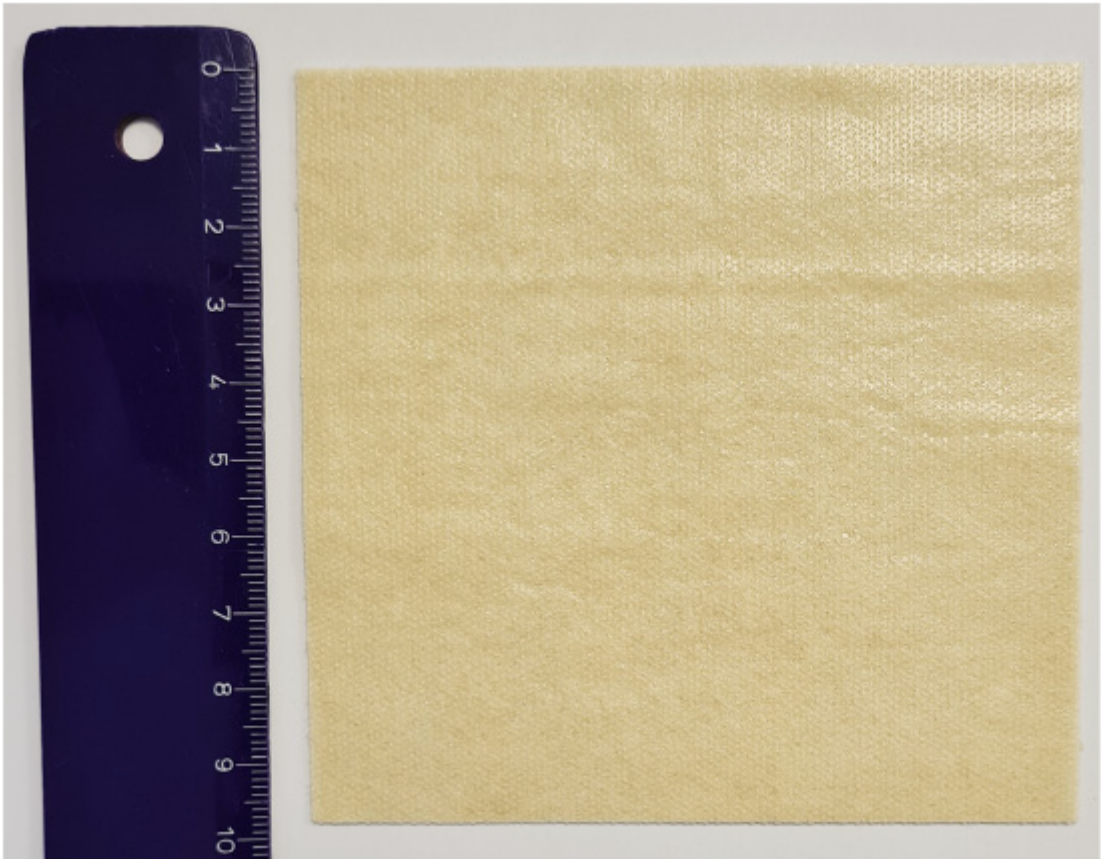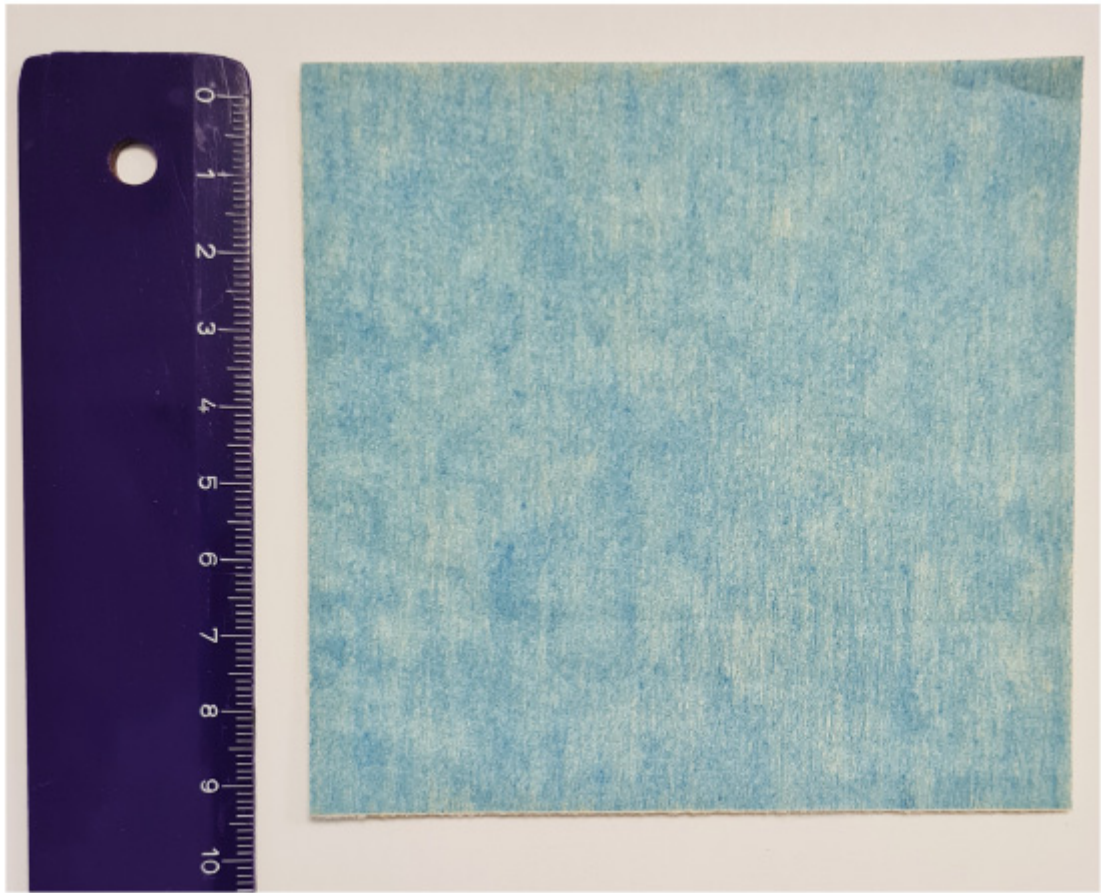

**Figure S2.** Larveel® wound dressing assembled with content of one vial per sheet; Top: front side for wound contact assembled with Larveel®; Down: hydrophobic blue backside.
